# Supplementary material for: CD95-induced osteoarthritic chondrocyte apoptosis and necrosis: dependency on p38 mitogen-activated protein kinase
Source: PubMed Central journal article supplement (PMC1526592; doi:10.1186/ar1891), 2006-01-16

**Relative transcript levels  
(arbitrary units, normalized to  
18S)**

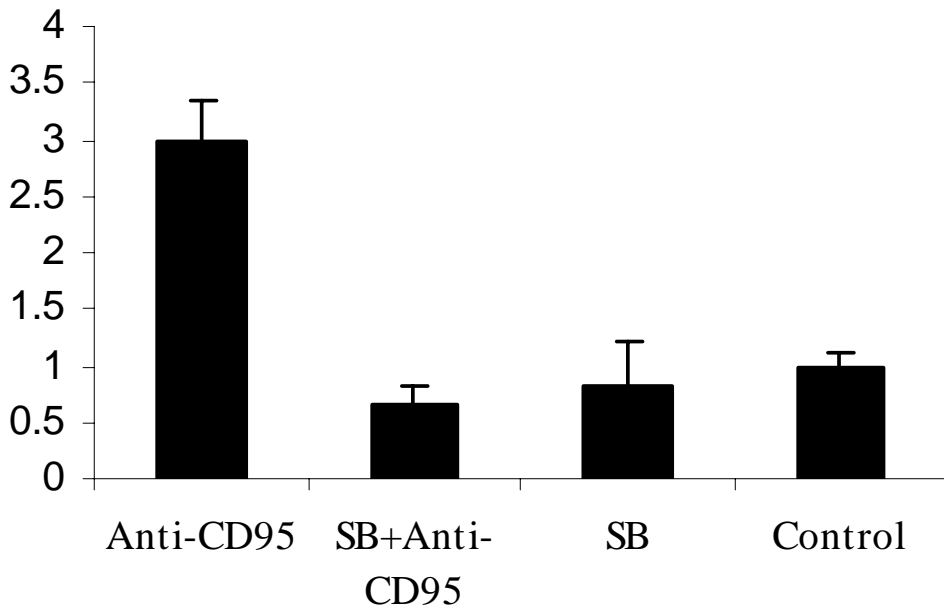

Supplement: ar1891-S1.pdf [file ar1891-S1.pdf]
