# Supplementary material for: CD95-induced osteoarthritic chondrocyte apoptosis and necrosis: dependency on p38 mitogen-activated protein kinase
Source: PubMed Central journal article supplement (PMC1526592; doi:10.1186/ar1891), 2006-01-16
Supplement: ar1891-S3.pdf [file ar1891-S3.pdf]

Cell death detected by Trypan blue

5  
4  
3  
2  
1

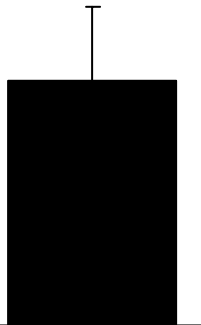

No Serum

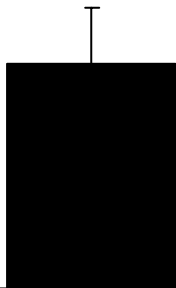

Serum
